# Supplementary material for: Controlled Growth of ZIF-8 Membranes on GO-Coated α-Alumina Supports via ZnO Atomic Layer Deposition for Improved Gas Separation
Source: MDPI journal article supplement (doi:10.3390/membranes14100216), 2024-10-14
Supplement: s1 [file s1]

Supporting Materials

# Controlled Growth of ZIF-8 Membranes on GO-Coated $\alpha$ -Alumina Supports via ZnO Atomic Layer Deposition for Improved Gas Separation

Nahyun Lee, Yun-ho Ahn, Jaheon Kim and Kiwon Eum \*

School of Chemical Engineering, Soongsil University, Seoul 06978, Republic of Korea

\* Correspondence: kiwon.eum@ssu.ac.kr

**Table S1.** Dope composition and conditions and for dry-jet-wet spinning of  $\alpha$ -alumina hollow fibers.

|                                                                          |           |
|--------------------------------------------------------------------------|-----------|
| Dope composition<br>(PES/NMP/Al <sub>2</sub> O <sub>3</sub> /PVP) (wt %) | 7/38/54/1 |
| Dope flow rate (ml/h)                                                    | 120       |
| Bore fluid                                                               | DI-water  |
| Bore fluid <sup>o</sup> flow rate (ml/h)                                 | 80        |
| Air gap (cm)                                                             | 3         |
| Operating temperature (K)                                                | 298       |
| Quench bath temperature (K)                                              | 298       |

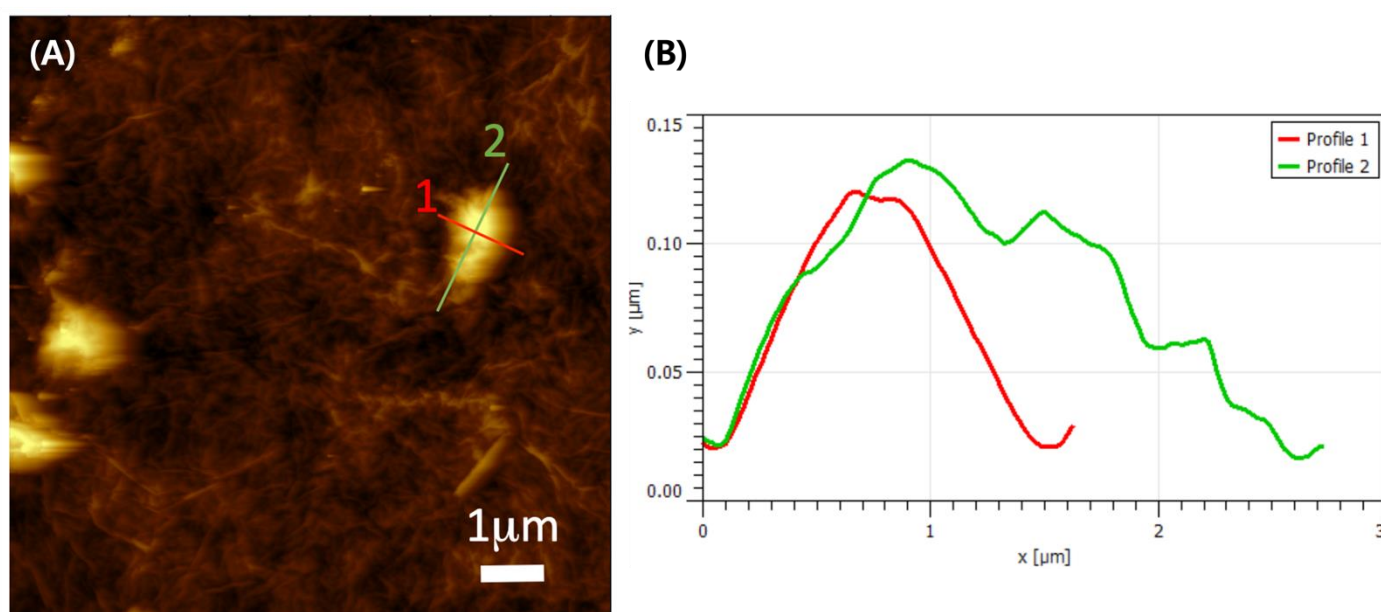

**Figure S1.** (A) AFM height mode image of GO-layered alumina support, and (B) corresponding line scan height information.

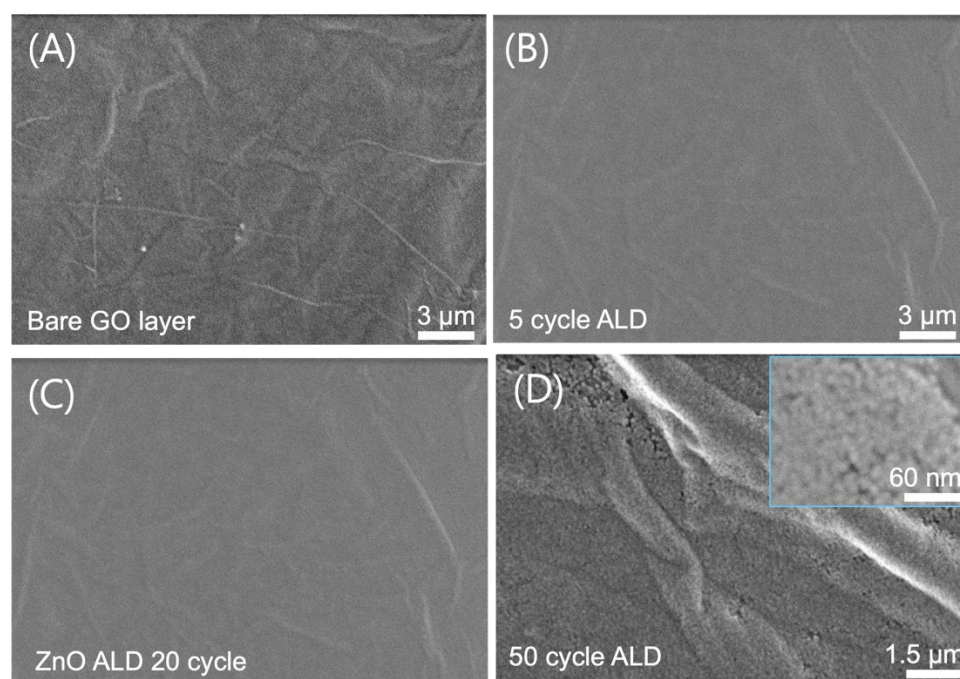

**Figure S2.** SEM images of GO surface with varying ZnO ALD cycles: (A) bare GO, (B) 5 cycles, (C) 20 cycles, and (D) 50 cycles (inset shows ZnO particles).

**Table S2.** Summary of membrane performance for propylene/propane separation in the literature.

| Membrane Type                                        | Support Type                          | Temperature(°C) | C <sub>3</sub> H <sub>6</sub> Permeance (GPU) | C <sub>3</sub> H <sub>6</sub> /C <sub>3</sub> H <sub>8</sub> Selectivity | Reference |
|------------------------------------------------------|---------------------------------------|-----------------|-----------------------------------------------|--------------------------------------------------------------------------|-----------|
| GO-coated ZIF-8                                      | Hollow fiber                          | 25              | 90                                            | 120                                                                      | This work |
| GO-coated ZIF-8                                      | Hollow fiber                          | 140             | 18                                            | 38                                                                       | This work |
| ZIF-8                                                | a-Al <sub>2</sub> O <sub>3</sub> disk | 120             | 32.0                                          | 30.1                                                                     | [22]      |
| ZIF-8                                                |                                       | 120             | 45.1                                          | 26.3                                                                     |           |
| ZIF-8                                                | Hollow fiber                          | 25              | 6.87                                          | 57                                                                       | [23]      |
| ZIF-8                                                | Hollow fiber                          | 25              | 116                                           | 6.9                                                                      | [24]      |
| ZIF-8                                                |                                       | 25              | 15.5                                          | 7.2                                                                      |           |
| ZIF-8                                                |                                       | 25              | 35.8                                          | 20.0                                                                     |           |
| ZIF-8                                                | a-Al <sub>2</sub> O <sub>3</sub> disk | 25              | 42.9                                          | 30.8                                                                     | [25]      |
| ZIF-8                                                | Hollow fiber                          | 25              | 31                                            | 10                                                                       | [26]      |
| ZIF-8                                                |                                       | 25              | 38                                            | 27                                                                       |           |
| ZIF-8                                                |                                       | 120             | 12                                            | 21                                                                       |           |
| ZIF-67                                               | a-Al <sub>2</sub> O <sub>3</sub> disk | 25              | 460                                           | 85                                                                       | [27]      |
| ZIF-8/ZIF-67                                         |                                       | 25              | 370                                           | 209                                                                      |           |
| PPO                                                  | film                                  | 32              | 0.1                                           | 4.3                                                                      | [28]      |
| PIM-1                                                | film                                  | 35              | 57.2                                          | 2.8                                                                      | [29]      |
| PIM-CD-1 wt%                                         |                                       |                 | 86.3                                          | 2.5                                                                      |           |
| PIM-CD-2 wt%                                         |                                       |                 | 100.6                                         | 2.4                                                                      |           |
| 6FDA-mPD                                             | film                                  | 35              | 0.01                                          | 10                                                                       | [30]      |
| 6FDA-TrMPD                                           | film                                  | 50              | 1.5                                           | 11                                                                       | [31]      |
| 6FDA-DDBT                                            |                                       |                 | 0.04                                          | 27                                                                       |           |
| 6FDA-ODA                                             |                                       |                 | 0.02                                          | 11                                                                       |           |
| PDMS/Silica-5%                                       | film                                  | 0               | 47.8                                          | 4.0                                                                      | [32]      |
| PDMS/Silica-10%                                      |                                       |                 | 38.5                                          | 4.5                                                                      |           |
| PDMS/Silica-15%                                      |                                       |                 | 31.7                                          | 5.2                                                                      |           |
| PDMS/Silica-20%                                      |                                       |                 | 15                                            | 6.8                                                                      |           |
| PDMS/Silica-25%                                      |                                       |                 | 9.7                                           | 7.3                                                                      |           |
| PDMS/Silica-30%                                      |                                       |                 | 4.3                                           | 10.2                                                                     |           |
| Carbon derived PI-LPSQ10                             | Hollow fiber                          | 35              | 3.4                                           | 22                                                                       | [33]      |
| Carbon derived PI                                    | film                                  |                 | 4.8                                           | 10                                                                       |           |
| Carbon derived from PAEK/Azide (50:50)-450°C         | film                                  | 35              | 0.03                                          | 31                                                                       | [34]      |
| Carbon derived from PAEK/Azide (50:50)-550°C         |                                       |                 | 0.02                                          | 48                                                                       |           |
| Carbon derived from BPDADDBT/DABA asymmetric (400°C) | Hollow fiber                          | 100             | 1.8                                           | 3                                                                        | [35]      |
| Carbon derived from BPDADDBT/DABA asymmetric (600°C) |                                       |                 | 51                                            | 12                                                                       |           |
| Ag-X                                                 | a-Al <sub>2</sub> O <sub>3</sub> disk | 30              | 231                                           | 94.2                                                                     | [36]      |
| NaX                                                  |                                       |                 | 245                                           | 5.55                                                                     |           |
| FAU                                                  | a-Al <sub>2</sub> O <sub>3</sub> disk | 25              | 203                                           | 7.9                                                                      | [37]      |
